# Supplementary material for: Enhancing Photoelectrochemical CO2 Reduction with CuBi2O4-Cellulose Nanofibers Hybrid Photocathodes
Source: Research Square preprint supplement (doi:10.21203/rs.3.rs-6749601/v1), 2025-07-10
Supplement: Supplementary file 1 [file 0770a2a4d90a47c99695501c.docx]

Supporting information

**Enhancing Photoelectrochemical CO2 Reduction with CuBi2O4-Cellulose Nanofibers Hybrid Photocathodes**

A Young Cho1,2†, Ji Hyun Yoon1,2†, Sangwoo Lee1,2, Heeseo Yun1,2, Jun-Young Park1,2, Jonghun Lee3,4* and Taekjib Choi1,2*

1 Hybrid Materials Research Center, Sejong University, Seoul 05006, Korea

2 Department of Nanotechnology and Advanced Materials Engineering, Sejong University, Seoul 05006, Korea

3Institute of Science and Technology, 333 Techno Jungang‑daero, Hyeonpung‑eup, Dalseong‑gun, Daegu 42988, Republic of Korea

4Department of Interdisciplinary Engineering, Graduate School, Daegu Gyeongbuk Institute of Science and Technology, 333 Techno Jungang‑daero, Hyeonpung‑eup, Dalseong‑gun, Daegu 42988, Republic of Korea

†These authors contributed equally to this work.

*Corresponding authors: [jhlee@dgist.ac.kr](mailto:jhlee@dgist.ac.kr); tjchoi@sejong.ac.kr


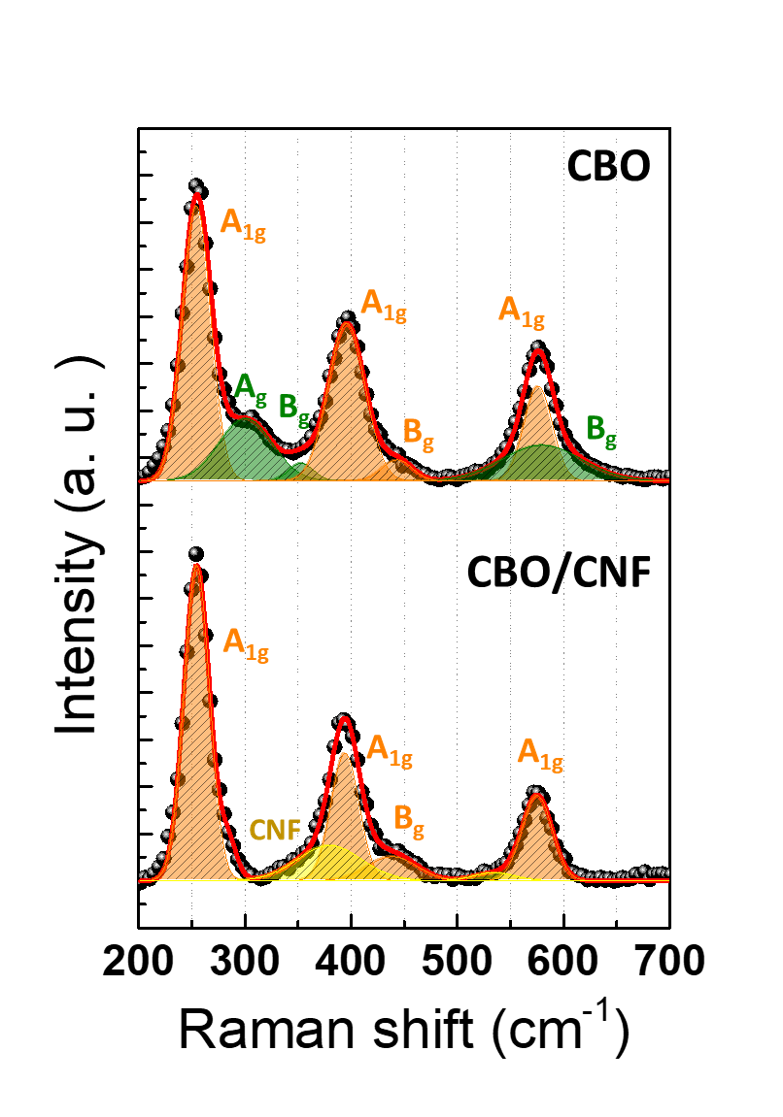


Fig. S1 Room temperature Raman spectra of CBO (above) and CBO/CNF (below). The orange lines represent peaks of the CuBi2O4 phases, green line represents CuO, and the yellow lines indicates the CNF. The open circles are experimental data, and the red lines mean the sum of Lorentzian functions


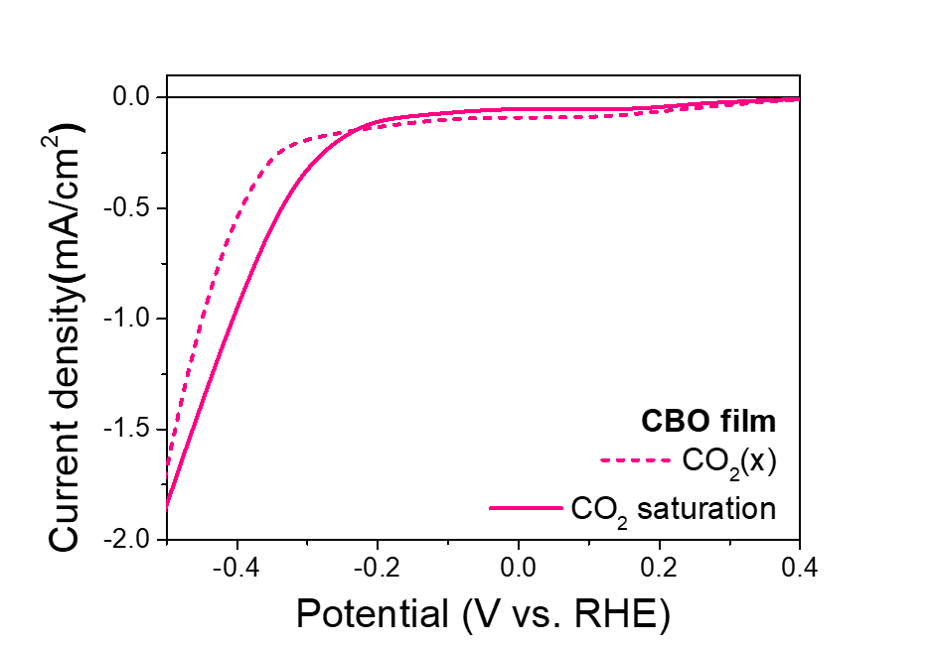


Fig. S2 LSV curves of CBO film in 0.1 M Na2SO4 (dotted line) and CO2 saturated 0.1 M NaHCO3 aqueous solution (solid line) under illumination


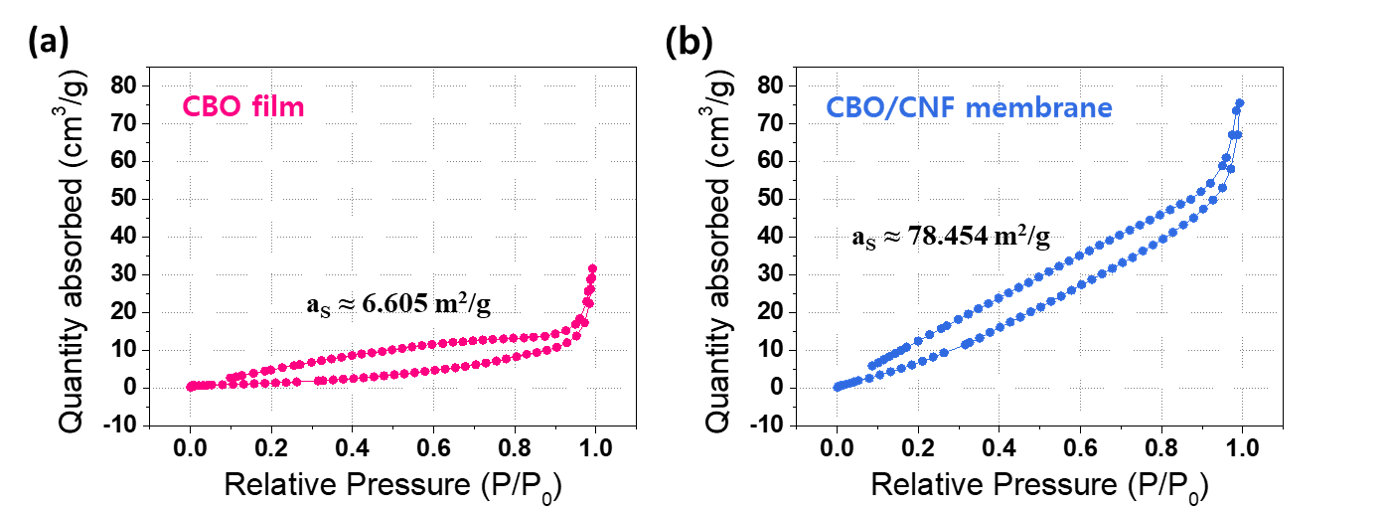


Fig. S3 BET surface areas measured from nitrogen adsorption-desorption isotherms for (a) CBO film and (b) CBO/CNF membrane, respectively


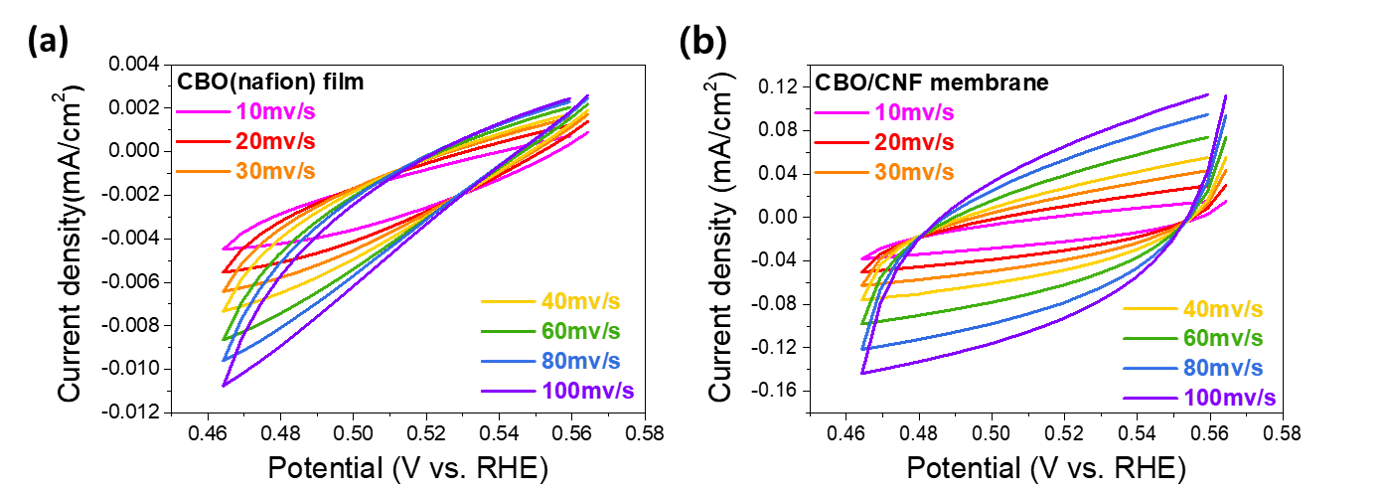


Fig. S4 CV curves measured in CO2 saturated 0.1 M NaHCO3 aqueous solution within a potential range (0.465 - 0.565 VRHE) of the (a) CBO film and (b) CBO/CNF membrane under illumination


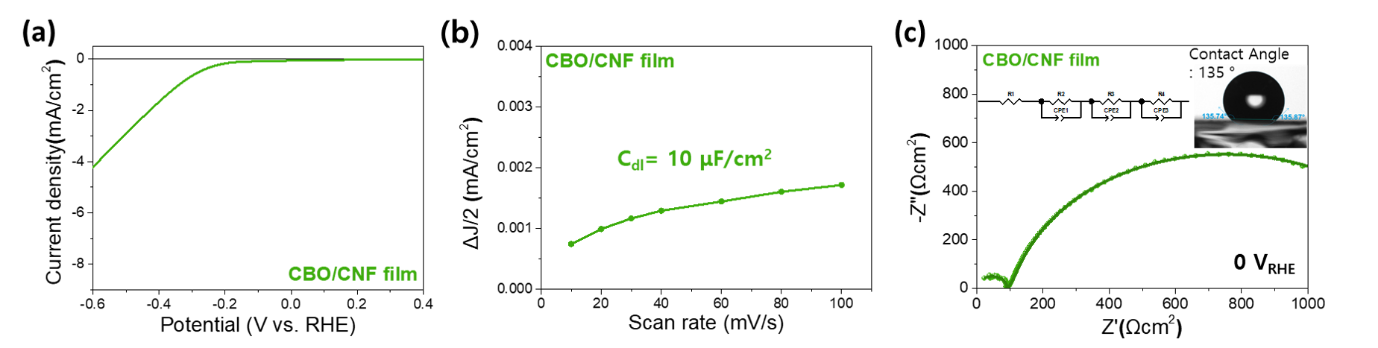


Fig. S5 PEC performances of CBO/CNF film in CO2 saturated 0.1 M NaHCO3 aqueous solution. (a) LSV curves. (b) Double layer capacitance calculated from CV. (c) Nyquist plot measured from 1 MHz to 1 Hz at 0 VRHE in PEIS. Inset data is static contact angle of the aqueous electrolyte (0.1 M NaHCO3) on the photoelectrode


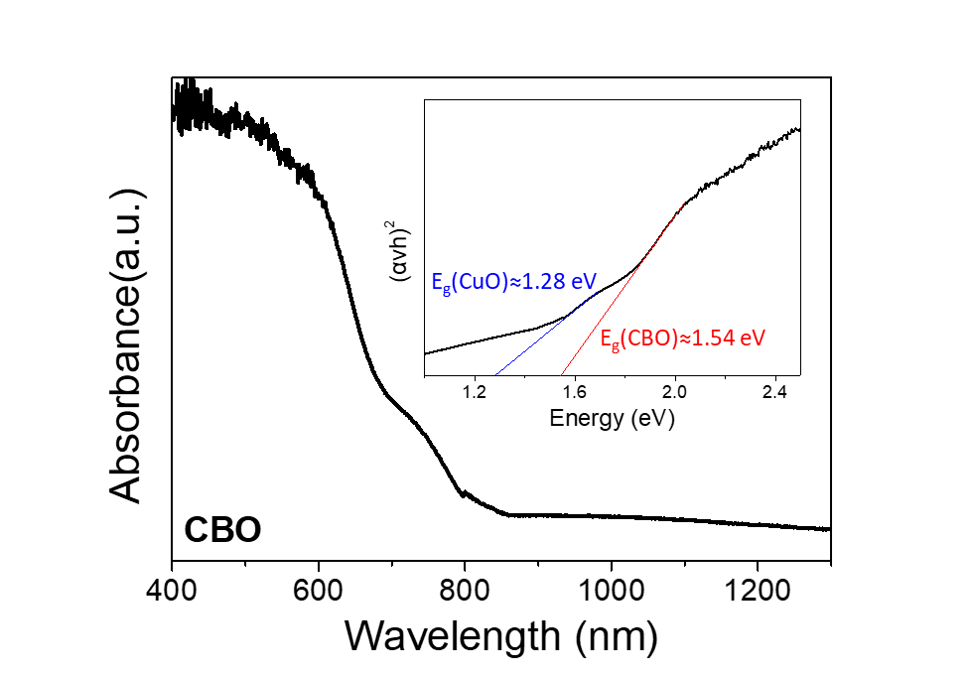


Fig. S6 UV-vis light absorption spectrum of the CBO film. The inset graph shows the calculated optical band gap by Tauc plot


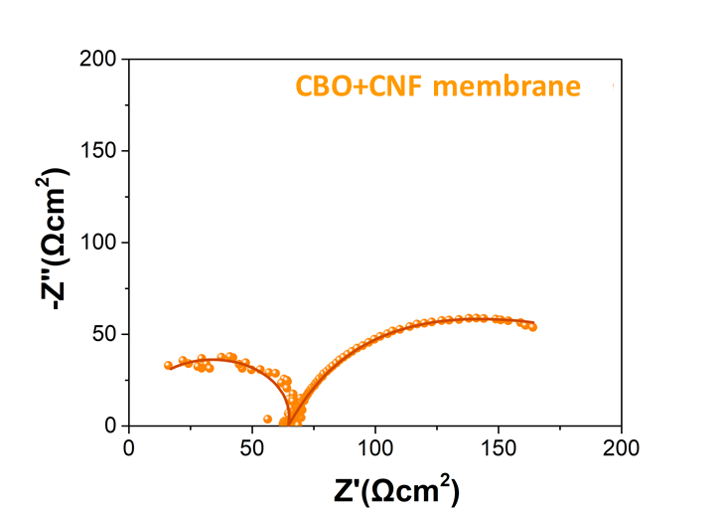


Fig. S7 PEIS Nyquist plot measured from 1 MHz to 1Hz at 0 VRHE of CBO+CNF membrane in CO2 saturated 0.1 M NaHCO3 aqueous solution
